# Supplementary material for: Anti-Inflammatory and Antiarthritic Activity of Anthraquinone Derivatives in Rodents
Source: Hindawi journal article supplement (doi:10.1155/2014/690596), 2014-01-01
Supplement: f1 [file 690596.f1.zip]

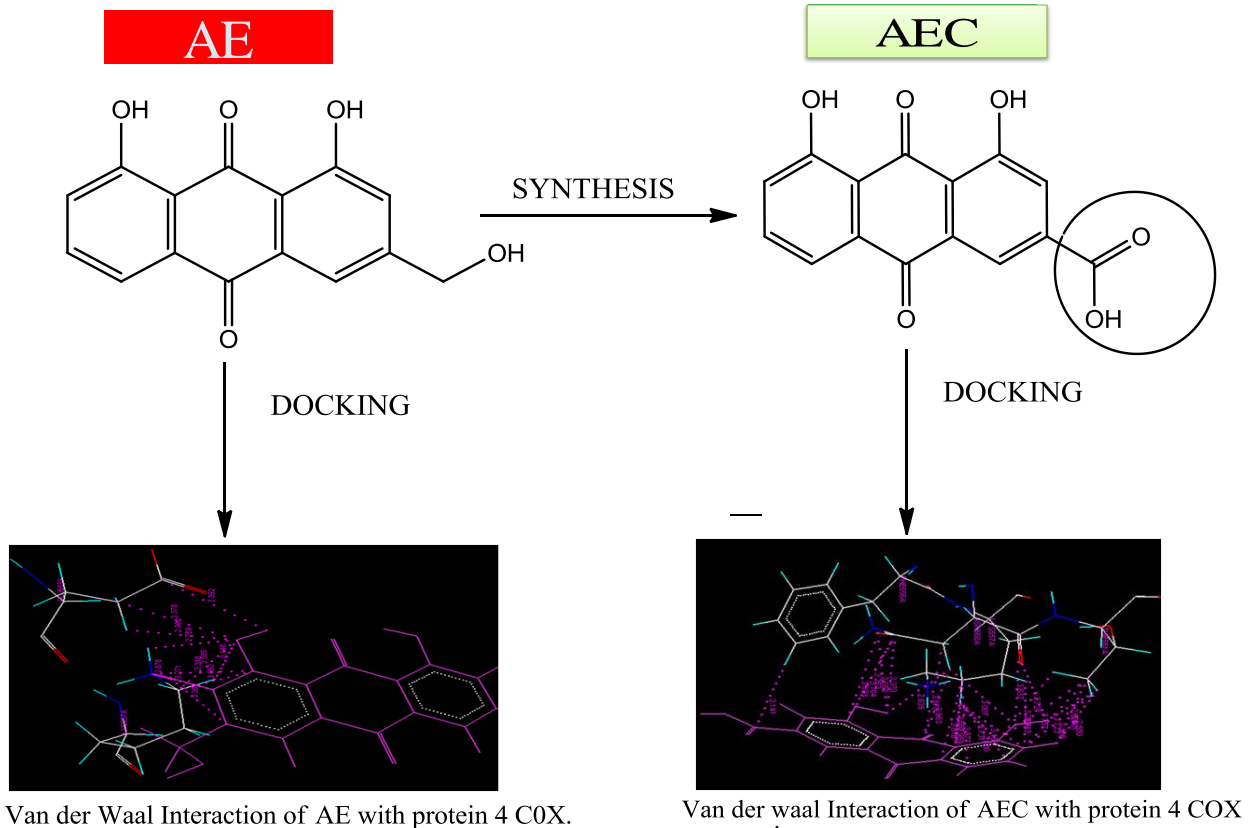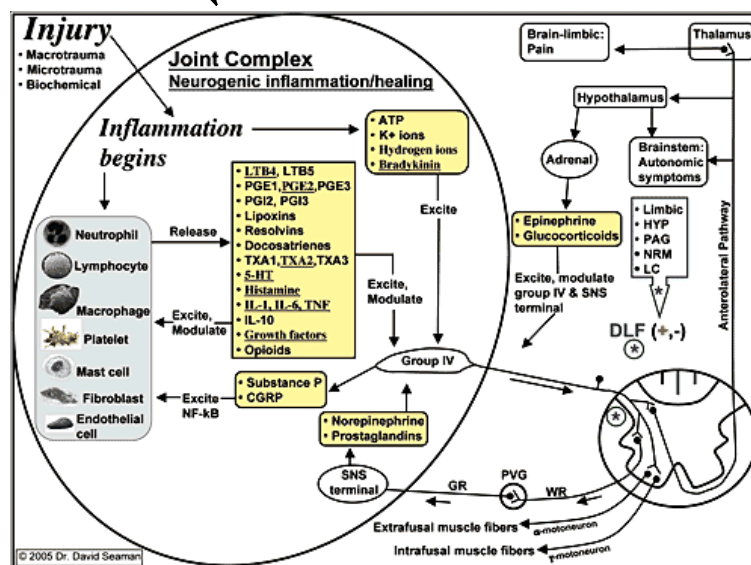

Specificity toward pro-inflammatory mediator increases  
Such as prostaglandins, interleukins, cytokines, TNF- $\alpha$ , fibroblasts
