# Supplementary figures and images for: Anti-Inflammatory and Antiarthritic Activity of Anthraquinone Derivatives in Rodents
Source: Hindawi journal article supplement (doi:10.1155/2014/690596), 2014-01-01

Figure S1:

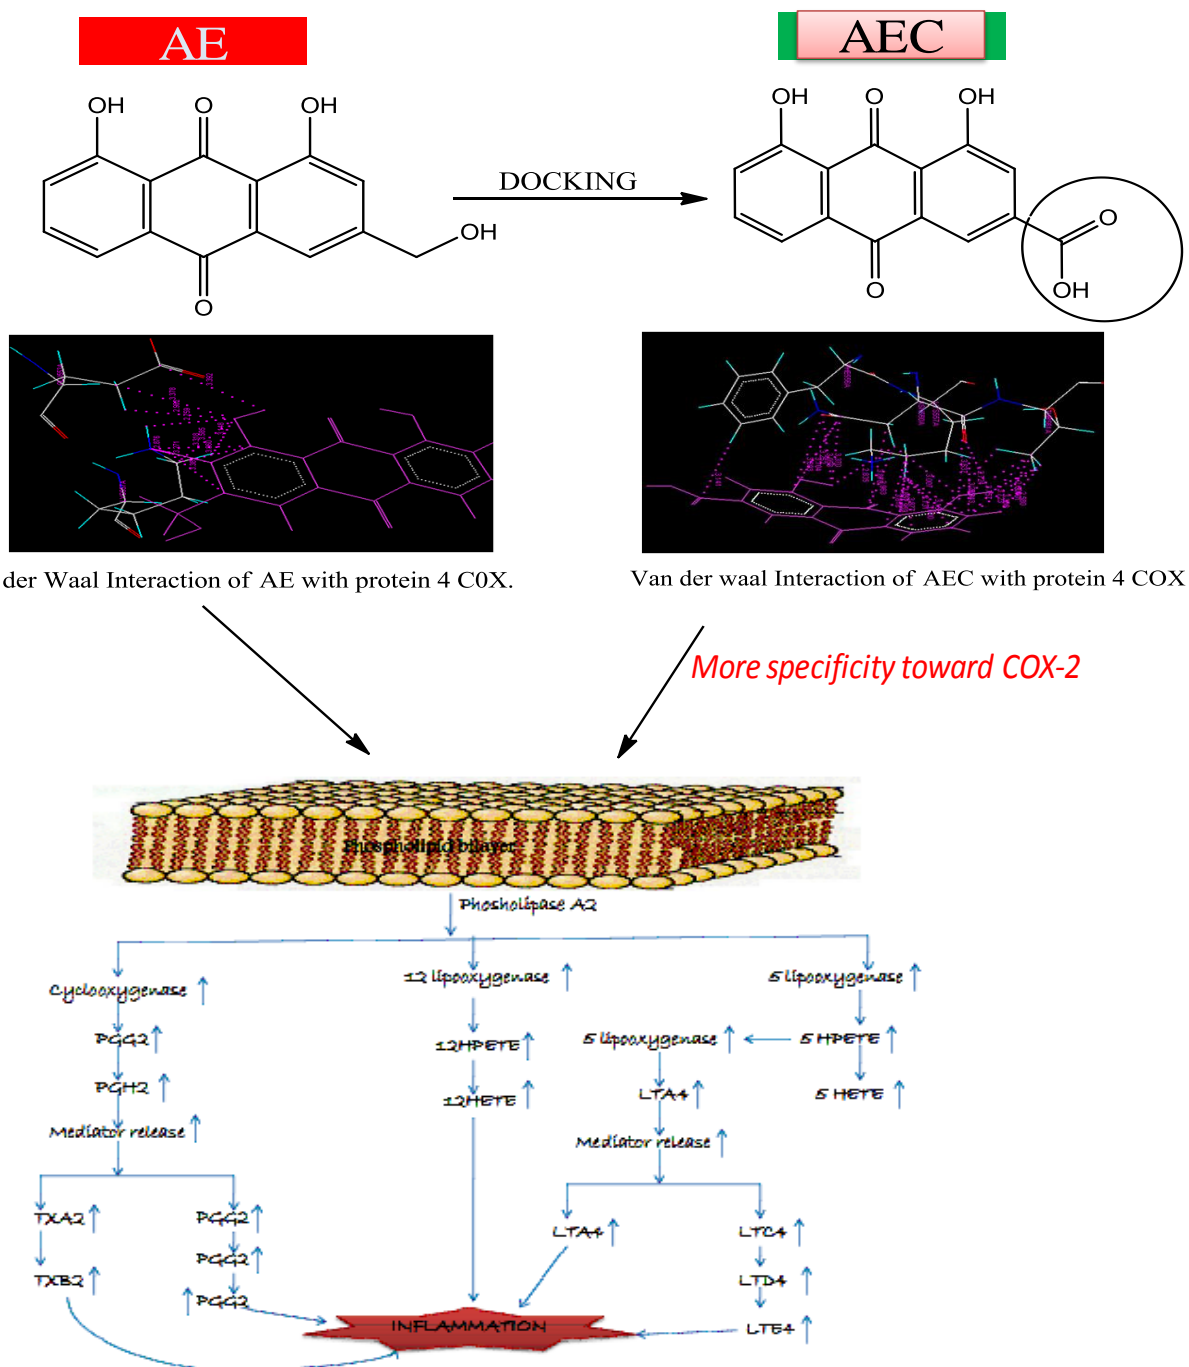

Supplement: f1 [file 690596.f1.zip]
